# Supplementary material for: Integrated data mining of transcriptomic and proteomic datasets to predict the secretome of adipose tissue and muscle in ruminants
Source: Royal Society of Chemistry journal article supplement (doi:10.1039/c6mb00224b), 2016-06-20
Supplement: c6mb00224b1.zip [file c6mb00224b1.zip]

## Sheet: GO term BP
Annotation performed on the list of the 1749 proteins found to be putatively secreted both by adipose tissue and muscle
GO	Function	Proteins	Gene Name	Ontology group	Count of protein	Number of proteins detected within the genome	GO frequency within the dataset (%)	GO frequency within the genome (%)	P-Value	P-Values_BH
GO:0030198	extracellular matrix organization	P02458(Evidence code:TAS/Database source:Reactome)P04085(Evidence code:TAS/Database source:Reactome)P49747(Evidence code:TAS/Database source:Reactome)Q9NS15(Evidence code:TAS/Database source:Reactome)Q96GW7(Evidence code:TAS/Database source:Reactome)P43235(Evidence code:TAS/Database source:Reactome)P32942(Evidence code:TAS/Database source:Reactome)P05121(Evidence code:TAS/Database source:Reactome…	COL2A1 PDGFA COMP LTBP3 BCAN CTSK ICAM3 SERPINE1 LAMA5 COL10A1 LRP4 ADAMTS3 KDR FBN1 CTSL PLOD2 COL6A1 NPNT ITGA1 NID2 COL6A3 TIMP1 EMILIN1 MMP15 NTN4 CD44 EFEMP1 COL9A2 ITGA3 RECK HAPLN1 ITGAE ITGAM DCN COL16A1 TIMP2 MFAP5 SDC2 LOX DDR2 VCAM1 POSTN ITGA6 COL9A1 COL20A1 LAMB3 MADCAM1 SPINK5 COL18A1 TNR SERPINH1 ADAM10 TTR MMP9 FGA MFAP4 AGRN FGG JAM2 MATN1 ITGA2 ITGA9 ITGB6 ADAM17 FBLN2 ICAM4 ADA…	BP	166	166 on 367	11.02	45.23	1.13e-189	7.238e-187
GO:0007411	axon guidance	Q8NFY4(Evidence code:TAS/Database source:Reactome)P54760(Evidence code:TAS/Database source:Reactome)P09619(Evidence code:TAS/Database source:Reactome)Q13214(Evidence code:TAS/Database source:PINC)O60486(Evidence code:TAS/Database source:Reactome)O15197(Evidence code:TAS/Database source:Reactome)P04141(Evidence code:TAS/Database source:Reactome)P10721(Evidence code:TAS/Database source:Reactome)P14…	SEMA6D EPHB4 PDGFRB SEMA3B PLXNC1 EPHB6 CSF2 KIT IL2RB GFRA1 CNTN1 EFNA4 FGFR4 TNR IL5 LAMB1 MMP2 NGFR PTPN11 NCAN SCN1B NTN4 FGFR1 LGI1 FGF18 PDGFA FGF3 GRIN2D ANGPT1 BTC COL6A2 ITGA2 ITGA9 PLXNA4 AGRN HFE2 MMP9 MET ADAM10 ITGB1 CNTNAP1 SEMA4A PDGFB HBEGF EPHA1 PLA2G10 NRP1 COL5A3 SEMA6A FGFR3 ITGA1 IL5RA COL6A3 KITLG NRCAM GRIN2B BDNF CSF2RA EFNB3 COL6A1 COL5A2 FGF7 RGMB NRXN1 EPHA7 SEMA4D TREM…	BP	108	108 on 558	7.17	19.35	1.451e-91	5.423e-89
GO:0045087	innate immune response	P05113(Evidence code:TAS/Database source:Reactome)P07478(Evidence code:TAS/Database source:Reactome)P10643(Evidence code:TAS/Database source:Reactome)O15399(Evidence code:TAS/Database source:Reactome)Q9NR96(Evidence code:TAS/Database source:BHF-UCL)P20366(Evidence code:IDA/Database source:UniProt)P21860(Evidence code:TAS/Database source:Reactome)O00206(Evidence code:TAS/Database source:BHF-UCL)P1…	IL5 PRSS2 C7 GRIN2D TLR9 TAC1 ERBB3 TLR4 HSP90B1 IL2RA PDGFB VIP FGF18 VNN1 CD3G CTSB HBEGF IGLL1 CFP PTX3 CFI CD59 VTN C2 PGLYRP2 C8A C3 FCGR1A F12 APCS C1R ITGB2 CFB CSF2 PDGFRB AGER PDGFA CHGA CTSK ADAM15 DEFB119 IL5RA TLR2 IL2RB KIT CFH C1QA KITLG C1S JCHAIN FGF3 FGF7 ITGAM C1QB CSF2RB SAA1 TLR5 ANGPT1 FGFR4 FGFR1 FCER1A ICAM3 C6 TREM1 PTPRA CD55 CTSL C8B LBP CD4 PGLYRP1 C4A NCAM1 GRIN2B FGFR…	BP	100	100 on 1222	6.64	8.18	4.693e-53	1.108e-50
GO:0070374	positive regulation of ERK1 and ERK2 cascade	P02671(Evidence code:IDA/Database source:BHF-UCL)O15467(Evidence code:IBA/Database source:GO_Central)P01127(Evidence code:IDA/Database source:UniProt)O76093(Evidence code:IC/Database source:UniProt)P22607(Evidence code:IMP/Database source:UniProt)Q6UXI9(Evidence code:ISS/Database source:BHF-UCL)P08697(Evidence code:IDA/Database source:BHF-UCL)Q96S42(Evidence code:IMP/Database source:BHF-UCL)O0058…	FGA CCL16 PDGFB FGF18 FGFR3 NPNT SERPINF2 NODAL CCL21 XCL2 CCL19 TREM2 NRP1 CCL25 VEGFB CCL3 GAS6 BMP2 CCL2 VEGFA CCL11 ICAM1 FGF10 BMPER F2R CSF1R NTRK1 CTGF CCL5 CCL24 FSHR PLA2G2A TEK ANGPT1 CD44 CCL8 FGFR4 FGG PDGFRB ADCYAP1 F2RL1 CCR7 KDR CCL14 SLAMF1 CCL4 PDGFA CCL22 PLA2G5	BP	49	49 on 161	3.25	30.43	4.572e-51	9.32e-49
GO:0008284	positive regulation of cell proliferation	P49767(Evidence code:TAS/Database source:PINC)P06756(Evidence code:IDA/Database source:BHF-UCL)P11362(Evidence code:IMP/Database source:UniProt)P01282(Evidence code:TAS/Database source:PINC)P46531(Evidence code:IDA/Database source:UniProt)P15018(Evidence code:TAS/Database source:PINC)P35070(Evidence code:TAS/Database source:PINC)P15514(Evidence code:IBA/Database source:GO_Central)O60383(Evidence …	VEGFC ITGAV FGFR1 VIP NOTCH1 LIF BTC AREG GDF9 HBEGF IL12RB2 INS IGF1 TNFRSF11A IFNG TGFB2 F2R OSM IL7 FLT3LG PDGFA CSF1R FGFR3 PROK2 CXCL10 GREM1 ADAM10 BAMBI PDGFRB CSF3 IL6 CHRNA7 VEGFA FOLR2 CCL14 FGF7 FN1 FGF18 TIMP1 ADAM17 TGFBR1 NTRK2 PTN CLCF1 INSR EDN3 SFRP2 PDGFB KDR WNT2 CTSH SFRP1 MST1R FGFR4 IL6ST NTF3 FIGF EDN2 CALR CSF1 PGF EDN1 FLT3 EPCAM IL6R VIPR1 CD47 IGF2 WNT1 SLAMF1 ESM1 FGF3…	BP	81	81 on 804	5.38	10.07	1.185e-49	1.833e-47
GO:0030335	positive regulation of cell migration	P15692(Evidence code:IDA/Database source:BHF-UCL)P09619(Evidence code:IDA/Database source:BHF-UCL)O95754(Evidence code:IBA/Database source:GO_Central)P07942(Evidence code:IDA/Database source:UniProt)Q9H1J7(Evidence code:IDA/Database source:UniProt)Q13214(Evidence code:IBA/Database source:GO_Central)Q13275(Evidence code:IBA/Database source:GO_Central)P25116(Evidence code:IMP/Database source:BHF-UC…	VEGFA PDGFRB SEMA4F LAMB1 WNT5B SEMA3B SEMA3F F2R NOTCH1 HGF SEMA3G SEMA5B SEMA4C SEMA3C MYOC INS HSPA5 PDGFB SEMA4G CDH13 BMP2 HBEGF ACVR1 CCL24 NTF3 SEMA4A EDN1 INSR ADAM10 TDGF1 TGFB1 ANGPTL3 SEMA4D THBS1 SEMA6D CSF1R IGF1 CCL11 CCL3 CEMIP CXCL16 EPHA1 SEMA6B CTSH SEMA4B F2RL1 ELP5 CCL5 ADAM17 CYR61 MMP14 COL1A1 KDR RET ROR2 PDGFA F10 TGFBR1 CSF1	BP	59	59 on 368	3.92	16.03	4.969e-47	6.367e-45
GO:0007267	cell-cell signaling	P13501(Evidence code:IDA/Database source:BHF-UCL)Q02763(Evidence code:TAS/Database source:PINC)Q9UHF5(Evidence code:TAS/Database source:PINC)O76093(Evidence code:TAS/Database source:PINC)P04085(Evidence code:TAS/Database source:PINC)P15514(Evidence code:TAS/Database source:PINC)P52797(Evidence code:TAS/Database source:PINC)Q9Y6Q6(Evidence code:TAS/Database source:PINC)P12272(Evidence code:TAS/Dat…	CCL5 TEK IL17B FGF18 PDGFA AREG EFNA3 TNFRSF11A PTHLH ADCYAP1 CXCL6 GDF5 CCL16 CCL4 WISP2 ASIP TRH CD97 ADAM10 TMED1 CCL3 NRP1 TSHR BDNF CCL8 AVP FAT1 WNT1 INSL3 PCDH8 INHBA GNRH1 CXCL9 SST SFRP2 AMH EFNA2 CXCL13 FGF3 BMP2 SSTR1 PGF LHB EFNA4 VIPR2 SEMA4F EFNB3 PPY CD86 SEMA3B ADM C1QA INHA CYR61 POMC IL7 EFNA1 TGFB2 CXCL10 EDN1 IL10 CCL22 TAC1 NOV EFNB1 EDN3 STAB1 CTGF ITGB2 INS BMP3 NMB CXCL14 …	BP	81	81 on 938	5.38	8.64	4.574e-45	5.545e-43
GO:0030574	collagen catabolic process	P78536(Evidence code:TAS/Database source:Reactome)P09958(Evidence code:TAS/Database source:Reactome)P27658(Evidence code:TAS/Database source:Reactome)P51511(Evidence code:TAS/Database source:Reactome)P12109(Evidence code:TAS/Database source:Reactome)P43235(Evidence code:IDA/Database source:BHF-UCL)P50281(Evidence code:TAS/Database source:Reactome)P02458(Evidence code:TAS/Database source:Reactome)…	ADAM17 FURIN COL8A1 MMP15 COL6A1 CTSK MMP14 COL2A1 COL1A1 MMP2 COL1A2 MMP7 ADAM10 COL16A1 ADAMTS3 CTSS MMP1 COL7A1 COL6A2 COL9A3 CTSB COL15A1 PRSS2 COL8A2 COL10A1 COL9A2 CTSL COL18A1 COL6A6 COL5A3 MMP13 MMP9 COL9A1 COL11A2 COL6A3 COL5A2	BP	36	36 on 75	2.39	48	7.836e-44	9.011e-42
GO:0007160	cell-matrix adhesion	P50895(Evidence code:IMP/Database source:BHF-UCL)Q13444(Evidence code:TAS/Database source:PINC)Q9Y5Y7(Evidence code:TAS/Database source:PINC)P06756(Evidence code:NAS/Database source:UniProt)Q9Y5C1(Evidence code:IPI/Database source:UniProt)P02671(Evidence code:IDA/Database source:BHF-UCL)P26006(Evidence code:TAS/Database source:PINC)O95274(Evidence code:IBA/Database source:GO_Central)P20701(Eviden…	BCAM ADAM15 LYVE1 ITGAV ANGPTL3 FGA ITGA3 LYPD3 ITGAL FBLN5 MSLN ECM2 ITGB5 ITGB8 ITGB7 ITGA2 ITGB1 HPSE SIGLEC1 ITGB4 CD44 THBS3 PKD1 VTN ADAMTS12 ITGB2 FGG CD34 VCAM1 STRC ITGA10 ITGA1 ITGA8 ITGA4 NPNT LYPD5 MADCAM1 ITGB3	BP	38	38 on 123	2.52	30.89	3.095e-40	3.155e-38
GO:0030203	glycosaminoglycan metabolic process	Q9Y251(Evidence code:TAS/Database source:Reactome)P18827(Evidence code:TAS/Database source:Reactome)P51654(Evidence code:TAS/Database source:Reactome)Q8WUJ3(Evidence code:TAS/Database source:Reactome)Q8NET6(Evidence code:TAS/Database source:Reactome)O14594(Evidence code:TAS/Database source:Reactome)Q12891(Evidence code:TAS/Database source:Reactome)P07686(Evidence code:TAS/Database source:Reactome…	HPSE SDC1 GPC3 CEMIP CHST13 NCAN HYAL2 HEXB CSPG4 ARSB STAB2 BCAN VCAN IDUA NAGLU IDS BGN DSE DCN GALNS OGN SDC4 GPC6 PRELP FMOD SDC2 ACAN LUM CHST1 AGRN LYVE1 GPC5 OMD GLB1 CD44 HS3ST1 DSEL B3GNT3 KERA HEXA	BP	40	40 on 166	2.66	24.1	1.311e-38	1.307e-36
GO:0018279	protein N-linked glycosylation via asparagine	P01229(Evidence code:TAS/Database source:Reactome)P27797(Evidence code:TAS/Database source:Reactome)Q9BVK2(Evidence code:TAS/Database source:Reactome)P01308(Evidence code:TAS/Database source:Reactome)Q9UBR2(Evidence code:TAS/Database source:Reactome)P14314(Evidence code:TAS/Database source:Reactome)P15514(Evidence code:TAS/Database source:Reactome)P00451(Evidence code:TAS/Database source:Reactome…	LHB CALR ALG8 INS CTSZ PRKCSH AREG F8 ALG1 COL7A1 RPN2 CD59 TMED10 OS9 EDEM2 MIA3 TMED7 DDOST SERPINA1 UGGT2 LMAN1 TUSC3 FUCA1 FOLR1 TMED3 SEC22B PDIA3 MCFD2 ALG6 CTSA CTSC ST8SIA4 F5 MLEC RPN1 CANX CD55 TMED2 GLB1	BP	39	39 on 178	2.59	21.91	2.592e-36	2.373e-34
GO:0019221	cytokine-mediated signaling pathway	Q9UBD9(Evidence code:NAS/Database source:UniProt)Q9NT99(Evidence code:IBA/Database source:GO_Central)P40189(Evidence code:IDA/Database source:BHF-UCL)P36888(Evidence code:ISS/Database source:UniProt)P08887(Evidence code:IDA/Database source:BHF-UCL)P13284(Evidence code:TAS/Database source:Reactome)Q86UN2(Evidence code:IBA/Database source:GO_Central)P42701(Evidence code:TAS/Database source:BHF-UCL)…	CLCF1 LRRC4B IL6ST FLT3 IL6R IFI30 RTN4RL1 IL12RB1 LRRTM4 EBI3 BGN LRP8 IL2RB RTN4RL2 FLRT3 B2M IL17RB IFNG FCGR1A IFNAR1 ICAM1 NCAM1 IL17RD DUOX2 PTPN11 DUOX1 LRRTM1 IL17RC CSF3 IL12RB2 IL22RA1 IFNLR1 IL17RE CCL2 VCAM1 IL10RB DCN IL1R2 LRRTM3 IL1RN IL13RA2 IL1RL2 LRRC66 TNFRSF1A IL17RA LRRC4C CD44 CHAD EDN2 IL5 CSF1R RSAD2 RTN4R KIT ASPN IL6 GP1BA IFNGR1	BP	58	58 on 596	3.85	9.73	1.847e-35	1.657e-33
GO:0048010	vascular endothelial growth factor receptor signaling pathway	P14784(Evidence code:TAS/Database source:Reactome)P04141(Evidence code:TAS/Database source:Reactome)P15509(Evidence code:TAS/Database source:Reactome)P21781(Evidence code:TAS/Database source:Reactome)O15399(Evidence code:TAS/Database source:Reactome)O15520(Evidence code:TAS/Database source:Reactome)P05106(Evidence code:TAS/Database source:Reactome)P01127(Evidence code:TAS/Database source:Reactome…	IL2RB CSF2 CSF2RA FGF7 GRIN2D FGF10 ITGB3 PDGFB ANGPT1 FGFR4 HBEGF IL2RG NCAM1 KDR IL17RD PDGFA VEGFA NRP1 TEK KITLG FGFR1 GRIN2B VEGFC NRP2 CDH5 ITGAV FGF3 FIGF IL2RA VEGFB CSF2RB FGFR3 IL5 PGF PTPRA BTC ERBB3 IL5RA PDGFRB AXL KIT FGF18	BP	42	42 on 279	2.79	15.05	4.611e-33	3.902e-31
GO:0006766	vitamin metabolic process	P02649(Evidence code:TAS/Database source:Reactome)P02774(Evidence code:TAS/Database source:Reactome)P06858(Evidence code:TAS/Database source:Reactome)P51654(Evidence code:TAS/Database source:Reactome)P31431(Evidence code:TAS/Database source:Reactome)O60494(Evidence code:TAS/Database source:Reactome)P13686(Evidence code:TAS/Database source:Reactome)P35354(Evidence code:TAS/Database source:Reactome…	APOE GC LPL GPC3 SDC4 CUBN ACP5 PTGS2 CD320 SDC2 APOC3 PTGIS TCN2 RDH11 AGRN GPC5 APOM COASY TCN1 GPC6 APOA4 PNLIP AASDHPPT APOC2 LRP8 APOB SDC1 APOA2 APOA1 TTR CTRC CTRB1 BTD	BP	33	33 on 131	2.19	25.19	1.042e-32	8.657e-31
GO:0010862	positive regulation of pathway-restricted SMAD protein phosphorylation	P17813(Evidence code:IDA/Database source:BHF-UCL)Q04771(Evidence code:IDA/Database source:BHF-UCL)O14793(Evidence code:IBA/Database source:GO_Central)P01137(Evidence code:IDA/Database source:BHF-UCL)P36897(Evidence code:IDA/Database source:BHF-UCL)Q9UK05(Evidence code:IDA/Database source:BHF-UCL)P12643(Evidence code:IDA/Database source:BHF-UCL)P61812(Evidence code:IBA/Database source:GO_Central)P…	ENG ACVR1 MSTN TGFB1 TGFBR1 GDF2 BMP2 TGFB2 GDF10 GDF9 INHBB BMP3 GDF15 NODAL GDF6 ACVRL1 BMP4 BMPR1A INHBA BMP5 BMP6 LEFTY2 ACVR2A GDF5 INHA	BP	25	25 on 46	1.66	54.35	5.256e-32	4.21e-30
GO:0014068	positive regulation of phosphatidylinositol 3-kinase signaling	P01308(Evidence code:IDA/Database source:BHF-UCL)P04085(Evidence code:IDA/Database source:UniProt)Q969H8(Evidence code:ISS/Database source:UniProt)Q16620(Evidence code:ISS/Database source:UniProt)P41159(Evidence code:ISS/Database source:UniProt)P07585(Evidence code:IDA/Database source:MGI)Q8IZJ1(Evidence code:IMP/Database source:UniProt)P21860(Evidence code:TAS/Database source:BHF-UCL)P11362(Evid…	INS PDGFA MYDGF NTRK2 LEP DCN UNC5B ERBB3 FGFR1 F2RL1 CCL5 TGFB2 FLT3 PDGFRB KDR SEMA4D CSF3 IGF1 F2R PDGFB KIT HGF FSHR MYOC TEK PLXNB1	BP	26	26 on 56	1.73	46.43	7.936e-32	6.244e-30
GO:0048011	neurotrophin TRK receptor signaling pathway	P01589(Evidence code:TAS/Database source:Reactome)P22607(Evidence code:TAS/Database source:Reactome)Q13224(Evidence code:TAS/Database source:Reactome)P04085(Evidence code:TAS/Database source:Reactome)Q99523(Evidence code:IMP/Database source:BHF-UCL)P11362(Evidence code:TAS/Database source:Reactome)P04141(Evidence code:TAS/Database source:Reactome)P78536(Evidence code:TAS/Database source:Reactome)…	IL2RA FGFR3 GRIN2B PDGFA SORT1 FGFR1 CSF2 ADAM17 FGF18 CSF2RB NCSTN ERBB3 GRIN2D FGFR4 FGF3 CSF2RA NTRK1 KIT FGF7 IL5RA HBEGF ADCYAP1 MAG TEK NCAM1 NTRK2 PDGFRB RTN4R OMG IL5 IL17RD NGFR IL2RG CD28 FGF10 PTPRA LINGO1 NGF FURIN KITLG PDGFB PTPN11 IL2RB CD86 ANGPT1 BTC	BP	46	46 on 392	3.05	11.73	9.744e-32	7.534e-30
GO:0006775	fat-soluble vitamin metabolic process	P06727(Evidence code:TAS/Database source:Reactome)P51654(Evidence code:TAS/Database source:Reactome)P78333(Evidence code:TAS/Database source:Reactome)P18827(Evidence code:TAS/Database source:Reactome)P04114(Evidence code:TAS/Database source:Reactome)P02655(Evidence code:TAS/Database source:Reactome)O60494(Evidence code:TAS/Database source:Reactome)O00468(Evidence code:TAS/Database source:Reactome…	APOA4 GPC3 GPC5 SDC1 APOB APOC2 CUBN AGRN GPC6 SDC4 TTR LRP8 GC APOE RDH11 SDC2 PNLIP APOC3 APOA2 APOM LPL APOA1	BP	22	22 on 32	1.46	68.75	4.733e-30	3.48e-28
GO:0007173	epidermal growth factor receptor signaling pathway	P11487(Evidence code:TAS/Database source:Reactome)P10721(Evidence code:TAS/Database source:Reactome)O76093(Evidence code:TAS/Database source:Reactome)P22607(Evidence code:TAS/Database source:Reactome)P13385(Evidence code:IDA/Database source:MGI)Q12805(Evidence code:IDA/Database source:UniProt)Q06124(Evidence code:TAS/Database source:Reactome)O43184(Evidence code:TAS/Database source:Reactome)P1136…	FGF3 KIT FGF18 FGFR3 TDGF1 EFEMP1 PTPN11 ADAM12 FGFR1 ANGPT1 PDGFA KITLG AREG HBEGF IL2RB PDGFRB IL17RD CSF2RA IL5 ADAM17 ADAM10 TGFB1 TEK CD86 GRIN2B PTPRA IL2RG FGFR4 IL2RA PIGR PDGFB IL5RA CD28 NCAM1 CSF2 CSF2RB GRIN2D ERBB3 FGF7 FGF10 BTC	BP	41	41 on 320	2.72	12.81	7.682e-30	5.557e-28
GO:0007157	heterophilic cell-cell adhesion via plasma membrane cell adhesion molecules	Q13740(Evidence code:IMP/Database source:UniProt)Q8N3J6(Evidence code:IBA/Database source:GO_Central)P78310(Evidence code:IDA/Database source:UniProt)Q86WK6(Evidence code:ISS/Database source:UniProt)Q06141(Evidence code:TAS/Database source:PINC)P19320(Evidence code:IDA/Database source:BHF-UCL)P07911(Evidence code:IDA/Database source:BHF-UCL)Q04900(Evidence code:IDA/Database source:MGI)Q86YT9(Evid…	ALCAM CADM2 CXADR AMIGO1 REG3A VCAM1 UMOD CD164 AMICA1 CD6 PVRL4 CADM1 FAT4 AMIGO3 DCHS1 PVRL3 CD200 NCR3 CADM3 ITGAL SELE ICAM1 AMIGO2	BP	23	23 on 45	1.53	51.11	4.283e-29	3.049e-27
GO:0001501	skeletal system development	P22003(Evidence code:NAS/Database source:UniProt)P05186(Evidence code:TAS/Database source:PINC)P51888(Evidence code:TAS/Database source:PINC)O14594(Evidence code:IBA/Database source:GO_Central)P55287(Evidence code:TAS/Database source:PINC)Q9NYJ7(Evidence code:IMP/Database source:UniProt)Q13253(Evidence code:TAS/Database source:PINC)P08123(Evidence code:IMP/Database source:UniProt)P01344(Evidence …	BMP5 ALPL PRELP NCAN CDH11 DLL3 NOG COL1A2 IGF2 VCAN LECT2 COL9A2 MATN3 PTH1R BMP2 HAPLN3 AHSG COMP HAPLN2 PTHLH TGFBR1 ACAN FRZB COL1A1 AEBP1 NPR3 COL2A1 COL10A1 FGFR3 BMP3 TNFRSF11B IGF1 IGFBP4 INHA BGLAP HAPLN1 FGFR1 FBN1 SPP2 COL11A2 BCAN GDF10 ARSE BMP6 EIF2AK3 POSTN	BP	46	46 on 472	3.05	9.75	1.461e-28	9.778e-27
GO:0010951	negative regulation of endopeptidase activity	Q9UK55(Evidence code:TAS/Database source:GOC)P07225(Evidence code:TAS/Database source:GOC)Q06033(Evidence code:TAS/Database source:GOC)P05155(Evidence code:IDA/Database source:GOC)Q99574(Evidence code:TAS/Database source:GOC)P01009(Evidence code:NAS/Database source:GOC)P02760(Evidence code:TAS/Database source:GOC)Q15828(Evidence code:TAS/Database source:GOC)P01042(Evidence code:IDA/Database sourc…	SERPINA10 PROS1 ITIH3 SERPING1 SERPINI1 SERPINA1 AMBP CST6 KNG1 SERPINA5 TIMP4 SERPIND1 FURIN A2M SERPINF2 SERPINC1 SERPINA11 LCN1 SPP2 SERPINA12 NGF ITIH4 TIMP1 CST3 WFDC2 SPINT2 SERPINA3 SERPINE2 SERPINH1 SPINT1 SERPINE1 AHSG SERPINE3 VTN SERPINA7 SERPINF1	BP	36	36 on 245	2.39	14.69	2.835e-28	1.843e-26
GO:0008286	insulin receptor signaling pathway	P32927(Evidence code:TAS/Database source:Reactome)P31785(Evidence code:TAS/Database source:Reactome)P01589(Evidence code:TAS/Database source:Reactome)P11487(Evidence code:TAS/Database source:Reactome)P05113(Evidence code:TAS/Database source:Reactome)P18433(Evidence code:TAS/Database source:Reactome)O76093(Evidence code:TAS/Database source:Reactome)P09619(Evidence code:TAS/Database source:Reactome…	CSF2RB IL2RG IL2RA FGF3 IL5 PTPRA FGF18 PDGFRB BTC IGF2 FGF10 IL5RA INS HBEGF KIT TLR9 GPLD1 ANGPT1 GRIN2D FGFR1 FGFR3 FGF7 IL2RB INSR IL17RD GRIN2B TEK PTPN11 PDGFA NCAM1 CSF2 STRADB CSF2RA KITLG PDGFB ERBB3 FGFR4	BP	37	37 on 302	2.46	12.25	1.733e-26	1.022e-24
GO:0006888	ER to Golgi vesicle-mediated transport	P12259(Evidence code:TAS/Database source:Reactome)Q9UBR2(Evidence code:TAS/Database source:Reactome)P49755(Evidence code:TAS/Database source:UniProt)P00451(Evidence code:TAS/Database source:Reactome)P49257(Evidence code:TAS/Database source:PINC)P07225(Evidence code:TAS/Database source:Reactome)P15328(Evidence code:TAS/Database source:Reactome)P04070(Evidence code:TAS/Database source:Reactome)Q9Y4…	F5 CTSZ TMED10 F8 LMAN1 PROS1 FOLR1 PROC HYOU1 MIA3 CD55 F10 CTSC CD59 MCFD2 SEC22B SERPINA1 TMED3 COL7A1 TMED2 TMED7 F2 BGLAP AREG INS GAS6	BP	26	26 on 100	1.73	26	1.971e-26	1.148e-24
GO:0001523	retinoid metabolic process	P31431(Evidence code:TAS/Database source:Reactome)Q92781(Evidence code:TAS/Database source:Reactome)P06858(Evidence code:TAS/Database source:Reactome)P78333(Evidence code:TAS/Database source:Reactome)P18827(Evidence code:TAS/Database source:Reactome)P51654(Evidence code:TAS/Database source:Reactome)Q9Y625(Evidence code:TAS/Database source:Reactome)P10745(Evidence code:TAS/Database source:Reactome…	SDC4 RDH5 LPL GPC5 SDC1 GPC3 GPC6 RBP3 APOB APOM LRP8 AGRN APOC2 RARRES2 APOC3 APOA1 PNLIP RDH11 TTR APOE APOA4 SDC2 APOA2	BP	23	23 on 83	1.53	27.71	4.166e-24	2.198e-22
GO:0008543	fibroblast growth factor receptor signaling pathway	P42081(Evidence code:TAS/Database source:Reactome)P04085(Evidence code:TAS/Database source:Reactome)P09619(Evidence code:TAS/Database source:Reactome)Q01344(Evidence code:TAS/Database source:Reactome)Q06124(Evidence code:TAS/Database source:Reactome)Q8NFM7(Evidence code:TAS/Database source:Reactome)O76093(Evidence code:TAS/Database source:Reactome)P05113(Evidence code:TAS/Database source:Reactome…	CD86 PDGFA PDGFRB IL5RA PTPN11 IL17RD FGF18 IL5 FGFR4 CSF2RA IL2RB FGF10 GRIN2B FGF7 FGFR1 GRIN2D HBEGF PDGFB CSF2 FLRT3 FGFR3 BTC PTPRA CSF2RB NCAM1 FGF3 IL2RA ERBB3 KITLG IL2RG CD28 KIT ANGPT1 TEK	BP	34	34 on 290	2.26	11.72	6.341e-24	3.269e-22
GO:0030509	BMP signaling pathway	Q13253(Evidence code:TAS/Database source:Reactome)P12643(Evidence code:IDA/Database source:BHF-UCL)P22004(Evidence code:ISS/Database source:BHF-UCL)Q6ZMH5(Evidence code:IMP/Database source:UniProt)Q13705(Evidence code:IDA/Database source:BHF-UCL)Q12841(Evidence code:TAS/Database source:Reactome)P37023(Evidence code:IMP/Database source:BHF-UCL)P36894(Evidence code:IDA/Database source:BHF-UCL)P1781…	NOG BMP2 BMP6 SLC39A5 ACVR2B FSTL1 ACVRL1 BMPR1A ENG GDF2 GDF9 BMP4 RGMB ACVR1 GDF6 HFE2 GDF10 GDF5 BMP5 BMP3 ACVR2A NODAL	BP	22	22 on 78	1.46	28.21	2.861e-23	1.395e-21
GO:0005975	carbohydrate metabolic process	P35475(Evidence code:TAS/Database source:Reactome)O60938(Evidence code:TAS/Database source:Reactome)Q06828(Evidence code:TAS/Database source:Reactome)Q9Y625(Evidence code:TAS/Database source:Reactome)P19961(Evidence code:NAS/Database source:PINC)Q9UL01(Evidence code:TAS/Database source:Reactome)P16112(Evidence code:TAS/Database source:Reactome)P21810(Evidence code:TAS/Database source:Reactome)P78…	IDUA KERA FMOD GPC6 AMY2B DSE ACAN BGN GPC5 BCAN GPC3 DCN LYVE1 VCAN HEXB SDC1 IDS NAGPA CHST1 CHIA LUM STAB2 AGRN OGN CHST13 DSEL SIAE GALNT7 GLB1 HPSE NAGLU HYAL2 SDC4 CSPG4 TREH HEXA CEMIP LALBA CD44 NCAN SPAM1 SDC2 LCT B3GNT3 OMD ARSB MANBA PRELP GAA HS3ST1 GALNS	BP	51	51 on 833	3.39	6.12	6.931e-23	3.307e-21
GO:0007179	transforming growth factor beta receptor signaling pathway	P08123(Evidence code:IDA/Database source:UniProt)Q15262(Evidence code:IDA/Database source:UniProt)P18084(Evidence code:IMP/Database source:UniProt)P43026(Evidence code:TAS/Database source:PINC)O75807(Evidence code:TAS/Database source:Reactome)P36897(Evidence code:ISS/Database source:AgBase)P05121(Evidence code:TAS/Database source:Reactome)Q04771(Evidence code:IDA/Database source:UniProt)P55107(Ev…	COL1A2 PTPRK ITGB5 GDF5 PPP1R15A TGFBR1 SERPINE1 ACVR1 GDF10 TGFB1 CDH5 LEFTY2 BMPR1A APOA1 ITGB1 LTBP2 ACVRL1 BAMBI FURIN GDF15 TGFB2 ENG F11R GDF9 PDGFB	BP	25	25 on 136	1.66	18.38	2.96e-22	1.341e-20
GO:0008285	negative regulation of cell proliferation	P07911(Evidence code:TAS/Database source:PINC)Q6FHJ7(Evidence code:IMP/Database source:BHF-UCL)Q15262(Evidence code:IDA/Database source:UniProt)P04629(Evidence code:IDA/Database source:UniProt)P12643(Evidence code:IDA/Database source:BHF-UCL)P46531(Evidence code:IDA/Database source:UniProt)Q96HF1(Evidence code:IMP/Database source:BHF-UCL)P22003(Evidence code:IDA/Database source:BHF-UCL)P12644(Evi…	UMOD SFRP4 PTPRK NTRK1 BMP2 NOTCH1 SFRP2 BMP5 BMP4 TGFB1 IL6 ADAMTS8 INHBA COL18A1 BAI1 ROR2 OSM CDH13 GPLD1 GPNMB ITGA1 FRZB PLG DLL4 CGREF1 SFRP5 IGFBP7 SST SSTR1 RARRES1 ACVRL1 IFNLR1 PTPRU CXCL8 SFRP1 CD164 GNRH1 AZGP1 IGFBP6 PTHLH F2R TGFB2 NOTCH2 SSTR4	BP	44	44 on 636	2.92	6.92	6.573e-22	2.948e-20
GO:0060395	SMAD protein signal transduction	P43026(Evidence code:IDA/Database source:UniProt)P12644(Evidence code:IDA/Database source:UniProt)P01137(Evidence code:IBA/Database source:GO_Central)P55107(Evidence code:IBA/Database source:GO_Central)P22003(Evidence code:IBA/Database source:GO_Central)P08476(Evidence code:IBA/Database source:GO_Central)Q9UK05(Evidence code:IBA/Database source:GO_Central)O00292(Evidence code:IBA/Database source:…	GDF5 BMP4 TGFB1 GDF10 BMP5 INHBA GDF2 LEFTY2 INHBB GDF9 BMP3 NODAL BMP2 MSTN BMP6 GDF15 GDF6 INHA TGFB2	BP	19	19 on 57	1.26	33.33	1.848e-21	7.676e-20
GO:0035987	endodermal cell differentiation	P13612(Evidence code:IEP/Database source:UniProt)P05107(Evidence code:IEP/Database source:UniProt)Q13751(Evidence code:IEP/Database source:UniProt)P06756(Evidence code:IMP/Database source:UniProt)Q96S42(Evidence code:IMP/Database source:BHF-UCL)P08476(Evidence code:IDA/Database source:BHF-UCL)Q02388(Evidence code:IEP/Database source:UniProt)P27658(Evidence code:IEP/Database source:UniProt)P14780(…	ITGA4 ITGB2 LAMB3 ITGAV NODAL INHBA COL7A1 COL8A1 MMP9 FN1 COL6A1 MMP14 LAMB1 MMP15 MMP2 ITGB5 VTN	BP	17	17 on 40	1.13	42.5	8.021e-21	3.128e-19
GO:0007229	integrin-mediated signaling pathway	P02647(Evidence code:IDA/Database source:UniProt)O15230(Evidence code:IMP/Database source:UniProt)O75578(Evidence code:IMP/Database source:UniProt)P05556(Evidence code:IMP/Database source:UniProt)P05106(Evidence code:TAS/Database source:BHF-UCL)P18084(Evidence code:IMP/Database source:UniProt)Q07092(Evidence code:TAS/Database source:UniProt)P05107(Evidence code:NAS/Database source:UniProt)Q13444(…	APOA1 LAMA5 ITGA10 ITGB1 ITGB3 ITGB5 COL16A1 ITGB2 ADAM15 CD47 FBLN1 ITGAV CEACAM1 CDH17 ITGA2 ITGB7 MADCAM1 ANGPTL3 ADAM10 ITGA2B	BP	20	20 on 79	1.33	25.32	1.672e-20	6.355e-19
GO:0043066	negative regulation of apoptotic process	Q14393(Evidence code:IDA/Database source:UniProt)P08138(Evidence code:TAS/Database source:Reactome)P49747(Evidence code:IDA/Database source:UniProt)P01138(Evidence code:TAS/Database source:Reactome)Q969H8(Evidence code:ISS/Database source:UniProt)P16444(Evidence code:IMP/Database source:UniProt)P12644(Evidence code:IDA/Database source:UniProt)Q92854(Evidence code:TAS/Database source:PINC)Q9HC23(E…	GAS6 NGFR COMP NGF MYDGF DPEP1 BMP4 SEMA4D PROK2 TDGF1 LTF PLAUR GCG IGF1 NOTCH2 ANGPT4 IL10 MPO IL2RB IL6 GREM1 VEGFB ALB PROC AVP PRLR CD27 TEK MMP9 CD44 VEGFA KDR SFRP1 IL6ST HSP90B1 ANGPTL4 ANGPT1 FCMR TNFRSF18 HSPA5 IL7 TNFRSF6B CTSH DNAJC3 IL4 THBS1 PPT1	BP	47	47 on 832	3.12	5.65	6.387e-20	2.274e-18
GO:0006508	proteolysis	P15088(Evidence code:TAS/Database source:UniProt)Q92542(Evidence code:NAS/Database source:UniProt)P00749(Evidence code:TAS/Database source:PINC)P56817(Evidence code:IDA/Database source:UniProt)P30101(Evidence code:TAS/Database source:GOC)P45452(Evidence code:TAS/Database source:PINC)Q8N474(Evidence code:IMP/Database source:GOC)Q9UKR0(Evidence code:IDA/Database source:UniProt)P09668(Evidence code:…	CPA3 NCSTN PLAU BACE1 PDIA3 MMP13 SFRP1 KLK12 CTSH CTSZ PRSS2 WFDC2 CTSF CTSB REN PROC CPZ CPB2 CTSL ACAN CTRC P4HB HTRA4 CPA1 MMP14 CELA3B GGH CTSK ADAM33 ENDOU ADAM17 F2 TPP1 CTSC CTSO HGF MMP2 PAPPA2 MMP9 CPQ KLK13 BACE2 PIK3IP1 CTSS MBTPS1 MMP1 ADAMTS9 LCN1 HP CTSA MMP7 KLK14 PLAT LRP8 HTRA1	BP	55	55 on 1156	3.65	4.76	8.872e-20	3.061e-18
GO:0060070	canonical Wnt signaling pathway	Q00604(Evidence code:IDA/Database source:BHF-UCL)P09544(Evidence code:IDA/Database source:BHF-UCL)Q9ULV1(Evidence code:IDA/Database source:BHF-UCL)Q9H461(Evidence code:IMP/Database source:CACAO)Q8N474(Evidence code:IDA/Database source:BHF-UCL)Q99835(Evidence code:IBA/Database source:GO_Central)O00744(Evidence code:IDA/Database source:BHF-UCL)Q92729(Evidence code:IDA/Database source:UniProt)O00144…	NDP WNT2 FZD4 FZD8 SFRP1 SMO WNT10B PTPRU FZD9 PTK7 WNT1 SFRP4 DIXDC1 SFRP5 FZD7 SFRP2 FZD6 FRZB FZD10 FZD5	BP	20	20 on 91	1.33	21.98	1.864e-19	6.148e-18
GO:0071347	cellular response to interleukin-1	P10147(Evidence code:IEP/Database source:UniProt)O00626(Evidence code:IBA/Database source:GO_Central)Q16647(Evidence code:IEP/Database source:UniProt)Q99731(Evidence code:IBA/Database source:GO_Central)O15467(Evidence code:IBA/Database source:GO_Central)P13500(Evidence code:ISS/Database source:BHF-UCL)Q9UBD3(Evidence code:IBA/Database source:GO_Central)P51671(Evidence code:IBA/Database source:GO_…	CCL3 CCL22 PTGIS CCL19 CCL16 CCL2 XCL2 CCL11 HYAL2 ADAMTS12 CCL21 CCL25 CCL24 CCL4 CCL8 SFRP1 CCL5 CXCL8 CCL14	BP	19	19 on 80	1.26	23.75	4.164e-19	1.334e-17
GO:0038095	Fc-epsilon receptor signaling pathway	P14784(Evidence code:TAS/Database source:Reactome)P21781(Evidence code:TAS/Database source:Reactome)P13591(Evidence code:TAS/Database source:Reactome)P21860(Evidence code:TAS/Database source:Reactome)Q06124(Evidence code:TAS/Database source:Reactome)Q13224(Evidence code:TAS/Database source:Reactome)P22455(Evidence code:TAS/Database source:Reactome)Q99075(Evidence code:TAS/Database source:Reactome…	IL2RB FGF7 NCAM1 ERBB3 PTPN11 GRIN2B FGFR4 HBEGF IL5 IL5RA FGF18 FGFR1 FGF10 PDGFA ANGPT1 FCER1A CSF2RB KIT CSF2 IL2RG PDGFB CD28 PTPRA IL17RD KITLG FGFR3 GRIN2D BTC FGF3 CD86 CSF2RA IL2RA PDGFRB TEK	BP	34	34 on 436	2.26	7.8	8.387e-19	2.63e-17
GO:0045669	positive regulation of osteoblast differentiation	P22004(Evidence code:IDA/Database source:BHF-UCL)P12644(Evidence code:IDA/Database source:MGI)P05231(Evidence code:TAS/Database source:BHF-UCL)P36894(Evidence code:IMP/Database source:BHF-UCL)Q13705(Evidence code:IMP/Database source:BHF-UCL)Q04771(Evidence code:IMP/Database source:BHF-UCL)P05019(Evidence code:IDA/Database source:BHF-UCL)Q6UXI9(Evidence code:ISS/Database source:BHF-UCL)P08887(Evid…	BMP6 BMP4 IL6 BMPR1A ACVR2B ACVR1 IGF1 NPNT IL6R IL6ST TMEM119 CYR61 DDR2 BMP2 LTF ACVR2A HGF	BP	17	17 on 57	1.13	29.82	1.123e-18	3.497e-17
GO:0042632	cholesterol homeostasis	P02655(Evidence code:IC/Database source:BHF-UCL)O15118(Evidence code:ISS/Database source:UniProt)O15496(Evidence code:ISS/Database source:BHF-UCL)P06858(Evidence code:IMP/Database source:BHF-UCL)P02652(Evidence code:IDA/Database source:BHF-UCL)P04114(Evidence code:IMP/Database source:BHF-UCL)P11150(Evidence code:IMP/Database source:BHF-UCL)Q9BZC7(Evidence code:IEP/Database source:UniProt)P06727(E…	APOC2 NPC1 PLA2G10 LPL APOA2 APOB LIPC ABCA2 APOA4 APOC3 APOE APOM ACSM3 APOA1 ANGPTL3 NPC2	BP	16	16 on 64	1.06	25	1.244e-16	3.555e-15
GO:0032924	activin receptor signaling pathway	Q13705(Evidence code:IMP/Database source:BHF-UCL)P36897(Evidence code:ISS/Database source:AgBase)P37023(Evidence code:IDA/Database source:GOC)Q6KF10(Evidence code:IDA/Database source:BHF-UCL)Q6ZVN8(Evidence code:IGI/Database source:BHF-UCL)P27037(Evidence code:IMP/Database source:BHF-UCL)P36896(Evidence code:IMP/Database source:BHF-UCL)P09529(Evidence code:IDA/Database source:UniProt)Q9UK05(Evide…	ACVR2B TGFBR1 ACVRL1 GDF6 HFE2 ACVR2A ACVR1B INHBB GDF2 ACVR1 INHBA	BP	11	11 on 23	0.73	47.83	2.024e-14	4.908e-13
GO:0071356	cellular response to tumor necrosis factor	Q12891(Evidence code:IEP/Database source:UniProt)P13500(Evidence code:ISS/Database source:BHF-UCL)P10145(Evidence code:IEP/Database source:UniProt)Q99731(Evidence code:IBA/Database source:GO_Central)P13385(Evidence code:IDA/Database source:UniProt)P10147(Evidence code:IEP/Database source:UniProt)Q9UBD3(Evidence code:IBA/Database source:GO_Central)O00585(Evidence code:IBA/Database source:GO_Centra…	HYAL2 CCL2 CXCL8 CCL19 TDGF1 CCL3 XCL2 CCL21 CCL5 CCL24 CCL4 SFRP1 ADAMTS12 CCL22 NPNT CCL25 CCL8 CCL16 CCL11 CRHBP CCL14	BP	21	21 on 232	1.39	9.05	2.198e-13	4.955e-12
GO:0007204	positive regulation of cytosolic calcium ion concentration	P01042(Evidence code:IDA/Database source:UniProt)Q9GZZ6(Evidence code:IGI/Database source:MGI)P0DJI8(Evidence code:NAS/Database source:UniProt)P55085(Evidence code:ISS/Database source:UniProt)O43927(Evidence code:IDA/Database source:BHF-UCL)P25101(Evidence code:TAS/Database source:PINC)Q9BXJ1(Evidence code:IDA/Database source:UniProt)P20366(Evidence code:IDA/Database source:UniProt)O00555(Evidenc…	KNG1 CHRNA10 SAA1 F2RL1 CXCL13 EDNRA C1QTNF1 TAC1 CACNA1A PROK2 CD55 EDN2 NPTN CALCR CCR7 EDN1 CHRNA9 F2R	BP	18	18 on 160	1.2	11.25	3.795e-13	8.425e-12
GO:0033209	tumor necrosis factor-mediated signaling pathway	P26842(Evidence code:TAS/Database source:Reactome)P78536(Evidence code:TAS/Database source:Reactome)Q93038(Evidence code:TAS/Database source:Reactome)P25942(Evidence code:TAS/Database source:Reactome)Q9NS68(Evidence code:NAS/Database source:GOC)Q9NP84(Evidence code:TAS/Database source:Reactome)P08138(Evidence code:IBA/Database source:GOC)O95407(Evidence code:TAS/Database source:Reactome)P36941(Ev…	CD27 ADAM17 TNFRSF25 CD40 TNFRSF19 TNFRSF12A NGFR TNFRSF6B LTBR TNFRSF18 TNFRSF11A TNFRSF10A TNFRSF1A TNFRSF11B TNFRSF4 RELT TNFRSF1B	BP	17	17 on 146	1.13	11.64	1.016e-12	2.2e-11
GO:0030336	negative regulation of cell migration	Q13253(Evidence code:IDA/Database source:BHF-UCL)Q15848(Evidence code:ISS/Database source:UniProt)P52823(Evidence code:IDA/Database source:UniProt)Q96HF1(Evidence code:ISS/Database source:UniProt)O94813(Evidence code:IMP/Database source:UniProt)Q5JRA6(Evidence code:IDA/Database source:BHF-UCL)O95980(Evidence code:IMP/Database source:BHF-UCL)Q8N474(Evidence code:IDA/Database source:UniProt)Q15262(…	NOG ADIPOQ STC1 SFRP2 SLIT2 MIA3 RECK SFRP1 PTPRK PTPRU EPHA1 SERPINE1 DAG1 IGFBP5 DPEP1 ENG ADAM15 ACVRL1	BP	18	18 on 190	1.2	9.47	5.387e-12	1.088e-10
GO:0070328	triglyceride homeostasis	Q9BY76(Evidence code:ISS/Database source:BHF-UCL)Q9Y5C1(Evidence code:ISS/Database source:BHF-UCL)P06727(Evidence code:IBA/Database source:GO_Central)Q6UXH0(Evidence code:IGI/Database source:MGI)P02647(Evidence code:IDA/Database source:BHF-UCL)P02656(Evidence code:IMP/Database source:BHF-UCL)P11150(Evidence code:IMP/Database source:BHF-UCL)P02655(Evidence code:IMP/Database source:BHF-UCL)P06858(E…	ANGPTL4 ANGPTL3 APOA4 C19orf80 APOA1 APOC3 LIPC APOC2 LPL APOC4	BP	10	10 on 31	0.66	32.26	7.462e-12	1.481e-10
GO:0035567	non-canonical Wnt signaling pathway	Q99835(Evidence code:IBA/Database source:GO_Central)Q8N474(Evidence code:IBA/Database source:GO_Central)Q92765(Evidence code:IBA/Database source:GO_Central)Q5T4F7(Evidence code:IBA/Database source:GO_Central)Q13467(Evidence code:IBA/Database source:GO_Central)Q96HF1(Evidence code:IBA/Database source:GO_Central)Q9H461(Evidence code:IBA/Database source:GO_Central)O00144(Evidence code:IBA/Database s…	SMO SFRP1 FRZB SFRP5 FZD5 SFRP2 FZD8 FZD9 FZD6 SFRP4	BP	10	10 on 33	0.66	30.3	1.253e-11	2.455e-10
GO:0007220	Notch receptor processing	P78504(Evidence code:TAS/Database source:Reactome)Q9UM47(Evidence code:TAS/Database source:Reactome)O14672(Evidence code:TAS/Database source:Reactome)Q92542(Evidence code:TAS/Database source:HGNC)P46531(Evidence code:TAS/Database source:Reactome)Q04721(Evidence code:TAS/Database source:Reactome)Q99466(Evidence code:TAS/Database source:Reactome)P78536(Evidence code:IDA/Database source:UniProt)Q9NR…	JAG1 NOTCH3 ADAM10 NCSTN NOTCH1 NOTCH2 NOTCH4 ADAM17 DLL4	BP	9	9 on 22	0.6	40.91	1.473e-11	2.872e-10
GO:0002224	toll-like receptor signaling pathway	P07858(Evidence code:TAS/Database source:Reactome)O60602(Evidence code:TAS/Database source:Reactome)P18428(Evidence code:TAS/Database source:Reactome)P25774(Evidence code:TAS/Database source:Reactome)P14625(Evidence code:TAS/Database source:Reactome)P43235(Evidence code:TAS/Database source:Reactome)P07711(Evidence code:TAS/Database source:Reactome)Q9BT09(Evidence code:TAS/Database source:Reactome…	CTSB TLR5 LBP CTSS HSP90B1 CTSK CTSL CNPY3 ITGAM ITGB2 TLR4 CD14 TLR2 TLR9 TLR3	BP	15	15 on 126	1	11.9	1.598e-11	3.09e-10
GO:0090280	positive regulation of calcium ion import	P01127(Evidence code:IDA/Database source:UniProt)P48061(Evidence code:TAS/Database source:BHF-UCL)P52823(Evidence code:IDA/Database source:UniProt)P13500(Evidence code:IDA/Database source:BHF-UCL)P10147(Evidence code:TAS/Database source:BHF-UCL)O15303(Evidence code:IMP/Database source:UniProt)P09619(Evidence code:ISS/Database source:UniProt)P21754(Evidence code:IDA/Database source:UniProt)	PDGFB CXCL12 STC1 CCL2 CCL3 GRM6 PDGFRB ZP3	BP	8	8 on 15	0.53	53.33	3.86e-11	7.066e-10
GO:0032735	positive regulation of interleukin-12 production	O60603(Evidence code:ISS/Database source:BHF-UCL)Q99731(Evidence code:ISS/Database source:BHF-UCL)Q15109(Evidence code:IMP/Database source:UniProt)Q9NR96(Evidence code:ISS/Database source:BHF-UCL)O00206(Evidence code:ISS/Database source:BHF-UCL)P01579(Evidence code:IDA/Database source:UniProt)Q9NPF7(Evidence code:IDA/Database source:BHF-UCL)P32248(Evidence code:ISS/Database source:BHF-UCL)O15455(…	TLR2 CCL19 AGER TLR9 TLR4 IFNG IL23A CCR7 TLR3	BP	9	9 on 33	0.6	27.27	2.953e-10	4.869e-09
GO:0097191	extrinsic apoptotic signaling pathway	O00206(Evidence code:TAS/Database source:Reactome)P08476(Evidence code:IDA/Database source:BHF-UCL)P36896(Evidence code:IMP/Database source:BHF-UCL)P08887(Evidence code:TAS/Database source:BHF-UCL)O15455(Evidence code:IDA/Database source:UniProt)P26842(Evidence code:IDA/Database source:BHF-UCL)Q8IZJ1(Evidence code:TAS/Database source:Reactome)P01579(Evidence code:IDA/Database source:BHF-UCL)P0857…	TLR4 INHBA ACVR1B IL6R TLR3 CD27 UNC5B IFNG CD14 TGFB1 TGFB2 IL12A TNFRSF10A	BP	13	13 on 110	0.86	11.82	3.819e-10	6.252e-09
GO:0007219	Notch signaling pathway	Q9NR61(Evidence code:TAS/Database source:Reactome)Q04721(Evidence code:IDA/Database source:UniProt)Q92542(Evidence code:TAS/Database source:Reactome)P78504(Evidence code:IMP/Database source:UniProt)O14672(Evidence code:ISS/Database source:UniProt)Q99466(Evidence code:TAS/Database source:Reactome)Q9UM47(Evidence code:TAS/Database source:Reactome)Q8NBL1(Evidence code:TAS/Database source:Reactome)P0…	DLL4 NOTCH2 NCSTN JAG1 ADAM10 NOTCH4 NOTCH3 POGLUT1 FURIN LFNG BMP2 CNTN1 GZMB POFUT1 NOTCH1	BP	15	15 on 162	1	9.26	4.071e-10	6.639e-09
GO:0032757	positive regulation of interleukin-8 production	O60602(Evidence code:IDA/Database source:BHF-UCL)Q15848(Evidence code:IDA/Database source:UniProt)O60603(Evidence code:IDA/Database source:BHF-UCL)P05121(Evidence code:IMP/Database source:BHF-UCL)Q9NR96(Evidence code:IDA/Database source:BHF-UCL)O15455(Evidence code:IDA/Database source:BHF-UCL)Q9UK05(Evidence code:IDA/Database source:BHF-UCL)O00206(Evidence code:IDA/Database source:BHF-UCL)P18428(…	TLR5 ADIPOQ TLR2 SERPINE1 TLR9 TLR3 GDF2 TLR4 LBP	BP	9	9 on 43	0.6	20.93	2.228e-09	3.224e-08
GO:0050728	negative regulation of inflammatory response	Q06418(Evidence code:ISS/Database source:UniProt)P04070(Evidence code:IMP/Database source:UniProt)Q02763(Evidence code:TAS/Database source:UniProt)Q15848(Evidence code:ISS/Database source:UniProt)P02649(Evidence code:IC/Database source:BHF-UCL)Q16647(Evidence code:IDA/Database source:UniProt)P02647(Evidence code:IDA/Database source:BHF-UCL)P19438(Evidence code:IMP/Database source:BHF-UCL)P0DJI8(E…	TYRO3 PROC TEK ADIPOQ APOE PTGIS APOA1 TNFRSF1A SAA1 NOV C1QTNF3	BP	11	11 on 99	0.73	11.11	1.512e-08	1.97e-07
GO:0044241	lipid digestion	P16233(Evidence code:TAS/Database source:Reactome)Q5VXJ0(Evidence code:TAS/Database source:Reactome)P54317(Evidence code:TAS/Database source:Reactome)Q5VYY2(Evidence code:TAS/Database source:Reactome)P11150(Evidence code:TAS/Database source:Reactome)	PNLIP LIPK PNLIPRP2 LIPM LIPC	BP	5	5 on 16	0.33	31.25	1.66e-06	1.526e-05
GO:0045715	negative regulation of low-density lipoprotein particle receptor biosynthetic process	Q15848(Evidence code:IDA/Database source:BHF-UCL)P05106(Evidence code:IMP/Database source:BHF-UCL)P06756(Evidence code:IMP/Database source:BHF-UCL)	ADIPOQ ITGB3 ITGAV	BP	3	3 on 3	0.2	100	1.87e-05	0.0001342
GO:0042981	regulation of apoptotic process	P07766(Evidence code:NAS/Database source:UniProt)Q9UK05(Evidence code:IBA/Database source:GO_Central)O60383(Evidence code:IBA/Database source:GO_Central)Q969Z4(Evidence code:IBA/Database source:GO_Central)P36888(Evidence code:TAS/Database source:UniProt)P22004(Evidence code:IBA/Database source:GO_Central)P05111(Evidence code:IBA/Database source:GO_Central)P09529(Evidence code:IBA/Database source:…	CD3E GDF2 GDF9 RELT FLT3 BMP6 INHA INHBB BMP3 TNFRSF25 GDF6 TNFRSF4 OLFM4 STRADB NTF3 CTSB GDF15 TNFRSF10A NME3 MSTN ROBO4 TGFB1 TNFRSF11B TNFRSF1A TNFRSF11A TNFRSF1B GAS1 BMP5 CALR LEFTY2 GDF10 NGFR GDF5	BP	33	33 on 1406	2.19	2.35	2.145e-05	0.0001518
GO:0010875	positive regulation of cholesterol efflux	P27169(Evidence code:IDA/Database source:BHF-UCL)Q15848(Evidence code:IDA/Database source:BHF-UCL)P02649(Evidence code:IDA/Database source:Alzheimers_Universit)P55058(Evidence code:IDA/Database source:AgBase)	PON1 ADIPOQ APOE PLTP	BP	4	4 on 14	0.27	28.57	2.583e-05	0.0001805
GO:0010804	negative regulation of tumor necrosis factor-mediated signaling pathway	Q14393(Evidence code:IDA/Database source:UniProt)P55085(Evidence code:IDA/Database source:UniProt)P02647(Evidence code:IDA/Database source:BHF-UCL)Q15848(Evidence code:IDA/Database source:BHF-UCL)	GAS6 F2RL1 APOA1 ADIPOQ	BP	4	4 on 15	0.27	26.67	3.246e-05	0.0002146
GO:0045599	negative regulation of fat cell differentiation	P01137(Evidence code:IDA/Database source:UniProt)O00744(Evidence code:IDA/Database source:BHF-UCL)Q15848(Evidence code:IDA/Database source:BHF-UCL)P04628(Evidence code:ISS/Database source:BHF-UCL)P05231(Evidence code:NAS/Database source:BHF-UCL)	TGFB1 WNT10B ADIPOQ WNT1 IL6	BP	5	5 on 40	0.33	12.5	8.184e-05	0.0004934
GO:0045650	negative regulation of macrophage differentiation	P08476(Evidence code:TAS/Database source:UniProt)P05111(Evidence code:TAS/Database source:UniProt)Q15848(Evidence code:IDA/Database source:BHF-UCL)	INHBA INHA ADIPOQ	BP	3	3 on 7	0.2	42.86	0.0001089	0.0006344
GO:0045600	positive regulation of fat cell differentiation	Q8N474(Evidence code:IDA/Database source:MGI)Q92765(Evidence code:IDA/Database source:MGI)P12643(Evidence code:ISS/Database source:UniProt)Q96HF1(Evidence code:IDA/Database source:MGI)Q99969(Evidence code:ISS/Database source:UniProt)	SFRP1 FRZB BMP2 SFRP2 RARRES2	BP	5	5 on 48	0.33	10.42	0.0001801	0.0009983
GO:0045662	negative regulation of myoblast differentiation	P46531(Evidence code:IMP/Database source:UniProt)O14793(Evidence code:IDA/Database source:CACAO)P12644(Evidence code:IDA/Database source:MGI)P01137(Evidence code:IDA/Database source:UniProt)	NOTCH1 MSTN BMP4 TGFB1	BP	4	4 on 26	0.27	15.38	0.0002105	0.001128
GO:0070373	negative regulation of ERK1 and ERK2 cascade	O00206(Evidence code:ISS/Database source:BHF-UCL)P35625(Evidence code:IMP/Database source:BHF-UCL)Q15848(Evidence code:IDA/Database source:UniProt)P23142(Evidence code:IDA/Database source:UniProt)Q15256(Evidence code:IMP/Database source:UniProt)	TLR4 TIMP3 ADIPOQ FBLN1 PTPRR	BP	5	5 on 50	0.33	10	0.0002147	0.001148
GO:0045721	negative regulation of gluconeogenesis	Q9BXJ4(Evidence code:IDA/Database source:MGI)Q15848(Evidence code:ISS/Database source:BHF-UCL)P01308(Evidence code:NAS/Database source:BHF-UCL)	C1QTNF3 ADIPOQ INS	BP	3	3 on 11	0.2	27.27	0.0003208	0.001648
GO:0071425	hematopoietic stem cell proliferation	Q96HF1(Evidence code:ISS/Database source:UniProt)O00744(Evidence code:IDA/Database source:BHF-UCL)P28906(Evidence code:IMP/Database source:UniProt)	SFRP2 WNT10B CD34	BP	3	3 on 14	0.2	21.43	0.0005861	0.002603
GO:0046326	positive regulation of glucose import	P06213(Evidence code:NAS/Database source:BHF-UCL)P01308(Evidence code:IDA/Database source:BHF-UCL)Q15848(Evidence code:ISS/Database source:BHF-UCL)P05019(Evidence code:IDA/Database source:UniProt)	INSR INS ADIPOQ IGF1	BP	4	4 on 35	0.27	11.43	0.0005887	0.002609
GO:0045444	fat cell differentiation	P09529(Evidence code:ISS/Database source:UniProt)Q9BRK5(Evidence code:ISS/Database source:BHF-UCL)Q9NZ08(Evidence code:NAS/Database source:UniProt)Q9BXJ4(Evidence code:IEP/Database source:UniProt)Q6KF10(Evidence code:ISS/Database source:UniProt)Q9H1J7(Evidence code:NAS/Database source:UniProt)	INHBB SDF4 ERAP1 C1QTNF3 GDF6 WNT5B	BP	6	6 on 101	0.4	5.94	0.0007095	0.003117
GO:0010888	negative regulation of lipid storage	P06756(Evidence code:IMP/Database source:BHF-UCL)P05231(Evidence code:NAS/Database source:BHF-UCL)P05106(Evidence code:IMP/Database source:BHF-UCL)	ITGAV IL6 ITGB3	BP	3	3 on 16	0.2	18.75	0.000823	0.003542
GO:0046716	muscle cell cellular homeostasis	Q8N3Y3(Evidence code:ISS/Database source:UniProt)O14793(Evidence code:IDA/Database source:CACAO)P02708(Evidence code:IMP/Database source:BHF-UCL)	GYLTL1B MSTN CHRNA1	BP	3	3 on 18	0.2	16.67	0.001113	0.004449
GO:0050995	negative regulation of lipid catabolic process	P01308(Evidence code:NAS/Database source:BHF-UCL)P02652(Evidence code:IDA/Database source:BHF-UCL)P02656(Evidence code:IDA/Database source:BHF-UCL)	INS APOA2 APOC3	BP	3	3 on 20	0.2	15	0.001461	0.005482
GO:0050715	positive regulation of cytokine secretion	P22301(Evidence code:IDA/Database source:BHF-UCL)P01308(Evidence code:IDA/Database source:UniProt)Q9BXJ4(Evidence code:IDA/Database source:UniProt)Q9BY67(Evidence code:IDA/Database source:UniProt)P0DJI8(Evidence code:IDA/Database source:UniProt)	IL10 INS C1QTNF3 CADM1 SAA1	BP	5	5 on 84	0.33	5.95	0.001944	0.006993
GO:0048630	skeletal muscle tissue growth	Q07001(Evidence code:IMP/Database source:BHF-UCL)P02708(Evidence code:IMP/Database source:BHF-UCL)	CHRND CHRNA1	BP	2	2 on 5	0.13	40	0.001971	0.006993
GO:2000467	positive regulation of glycogen (starch) synthase activity	Q15848(Evidence code:ISS/Database source:UniProt)P01344(Evidence code:ISS/Database source:BHF-UCL)	ADIPOQ IGF2	BP	2	2 on 5	0.13	40	0.001971	0.006993
GO:0007517	muscle organ development	P02778(Evidence code:TAS/Database source:PINC)P05019(Evidence code:TAS/Database source:PINC)P12111(Evidence code:TAS/Database source:PINC)Q99075(Evidence code:TAS/Database source:PINC)P24043(Evidence code:TAS/Database source:PINC)Q9H9P2(Evidence code:NAS/Database source:HGNC)Q8IUX7(Evidence code:TAS/Database source:PINC)Q16586(Evidence code:TAS/Database source:PINC)O14793(Evidence code:TAS/Databa…	CXCL10 IGF1 COL6A3 HBEGF LAMA2 CHODL AEBP1 SGCA MSTN	BP	9	9 on 276	0.6	3.26	0.002347	0.008186
GO:1900165	negative regulation of interleukin-6 secretion	Q14393(Evidence code:IDA/Database source:UniProt)Q9BXJ4(Evidence code:IDA/Database source:UniProt)	GAS6 C1QTNF3	BP	2	2 on 6	0.13	33.33	0.00261	0.008843
GO:0090336	positive regulation of brown fat cell differentiation	P01308(Evidence code:TAS/Database source:BHF-UCL)P35354(Evidence code:ISS/Database source:BHF-UCL)	INS PTGS2	BP	2	2 on 6	0.13	33.33	0.00261	0.008843
GO:0042593	glucose homeostasis	P01308(Evidence code:IMP/Database source:BHF-UCL)Q15848(Evidence code:ISS/Database source:UniProt)P06213(Evidence code:IMP/Database source:BHF-UCL)P47871(Evidence code:ISS/Database source:UniProt)P22455(Evidence code:ISS/Database source:UniProt)P08138(Evidence code:ISS/Database source:UniProt)	INS ADIPOQ INSR GCGR FGFR4 NGFR	BP	6	6 on 165	0.4	3.64	0.007345	0.02186
GO:0055089	fatty acid homeostasis	P02649(Evidence code:IDA/Database source:Alzheimers_Universit)P01308(Evidence code:IMP/Database source:BHF-UCL)	APOE INS	BP	2	2 on 12	0.13	16.67	0.008157	0.02386
GO:0015909	long-chain fatty acid transport	Q6JVE5(Evidence code:TAS/Database source:Reactome)P31025(Evidence code:TAS/Database source:Reactome)P02649(Evidence code:IDA/Database source:Alzheimers_Universit)	LCN12 LCN1 APOE	BP	3	3 on 40	0.2	7.5	0.008793	0.02557
GO:0009749	response to glucose	P02652(Evidence code:IDA/Database source:BHF-UCL)P80108(Evidence code:IDA/Database source:UniProt)P07996(Evidence code:IDA/Database source:BHF-UCL)P06858(Evidence code:ISS/Database source:AgBase)Q15848(Evidence code:ISS/Database source:BHF-UCL)	APOA2 GPLD1 THBS1 LPL ADIPOQ	BP	5	5 on 123	0.33	4.07	0.009056	0.02629
GO:0045717	negative regulation of fatty acid biosynthetic process	O94905(Evidence code:IMP/Database source:UniProt)P02656(Evidence code:IDA/Database source:BHF-UCL)	ERLIN2 APOC3	BP	2	2 on 13	0.13	15.38	0.009351	0.02661
GO:0014841	skeletal muscle satellite cell proliferation	Q96KG7(Evidence code:ISS/Database source:UniProt)	MEGF10	BP	1	1 on 1	0.07	100	0.01959	0.0429
GO:0014734	skeletal muscle hypertrophy	Q99972(Evidence code:ISS/Database source:UniProt)	MYOC	BP	1	1 on 1	0.07	100	0.01959	0.0429
GO:0050996	positive regulation of lipid catabolic process	P02652(Evidence code:IDA/Database source:BHF-UCL)Q9Y5C1(Evidence code:IDA/Database source:BHF-UCL)	APOA2 ANGPTL3	BP	2	2 on 22	0.13	9.09	0.02318	0.04999
