# Supplementary material for: Integrated data mining of transcriptomic and proteomic datasets to predict the secretome of adipose tissue and muscle in ruminants
Source: Royal Society of Chemistry journal article supplement (doi:10.1039/c6mb00224b), 2016-06-20
Supplement: c6mb00224b1.zip [file Supplemental_data_GeneNameAdipose_Bonnet.xlsx]

## Sheet: Adipose Specific Gene Name
Gene names corresponding to 188 proteins found to be putatively secreted by adipose tissue
adam32
adam3a
adam8
antxrl
apof
astl
b3galnt2
b4galt5
bmp2k
c16orf89
c2orf69
c7h19orf24
c8g
ccl1
ccl27
cd164l2
cd300lb
cd84
cd93
cd99
cdhr2
cdhr4
ceacam20
ceacam8
cers1
cist1
cnnm3
cntn2
col22a1
cort
crb1
crb2
crhr1
crtam
cst11
cxhxorf36
defb124
dkfzp564o0823
dkk4
dll1
ela2a
elfn1
eqtn
ereg
ero1lb
fam135a
fam180a
fam187b
fcrla
fetub
flrt2
fuca2
gh
gimap6
gkn2
gnly
gp9
gpihbp1
grin1
grin3b
grk4
grm4
gzmm
h6pd
havcr2
hhipl1
igdcc3
il17c
il1rap
il23r
il34
insrr
iyd
kiss1
kl
klk11
klk4
lag3
lamb2
lcn6
ldlrad2
lilra4
lingo3
lman1l
loc100138004
loc100297594
loc100336251
loc101905477
loc101907157
loc101910045
loc504773
loc505033
loc508858
loc509263
loc525947
loc528262
loc538674
loc539042
loc614476
loc615247
loc617765
loc618703
loc618859
loc781146
loc784768
loc784932
loc785621
loc785756
loc785803
loc786126
loc786246
loc786628
loc787241
lrrc15
lrrn2
lrrn4
lrrtm2
ltbp4
ly6e
ly75
lyz3
man2b2
mansc4
megf6
mgat5b
mgc133636
mgc137099
mmgt1
mmp19
muc20
nfasc
npc1l1
olfm3
ovch2
pcdha11
pcdhb6
pcdhb7
pcdhb8
pcdhga7
pdcd1lg2
pigx
pkd1l2
pkd1l3
pkdrej
pla2g4f
plch2
podnl1
prg3
prrt3
prss33
prss42
prss48
prss53
prss8
pspn
ptcra
pvrl2
rnase11
rnf43
rtbdn
sarm1
sectm1a
selm
sema6c
serpini2
shisa3
siglec14
siglec15
slc24a4
slc9a4
slitrk1
sowaha
st8sia6
tecta
thy1
tll1
tlr8
tmem190
tmem259
tmigd2
traf2
txndc16
ugt3a1
ulbp27
ulbp4
uts2b
zacn
zrsr2y
