# Supplementary material for: Integrated data mining of transcriptomic and proteomic datasets to predict the secretome of adipose tissue and muscle in ruminants
Source: Royal Society of Chemistry journal article supplement (doi:10.1039/c6mb00224b), 2016-06-20
Supplement: c6mb00224b1.zip [file Supplemental_data_GeneNameMuscle_Bonnet.xlsx]

## Sheet: Muscle specific Gene Name
Gene names corresponding to 357 proteins found to be putatively secreted by muscle
abhd15
acrv1
adamts7
ajap1
alg12
alpi
amely
ang
ang1
apoa5
apon
arhgap36
arsa
atp6ap2
atraid
awat2
b3gat2
baat
bai2
base
bdmd1
blt
bmp1
bmp10
bmp15
bpifa2a
bpifb4
bsp30c
bthrg
btnl9
c1qtnf8
c2orf28
c2orf82
c4bpb
c5h12orf53
calc3
cartpt
cathl2
cathl3
cathl7
cbln1
ccl17
ccl20
cd226
cd45
cd79b
cdh9
cdsn
cela2a
cer1
ces5a
cfd
cga
chadl
chi3l1
chrna2
chrna4
chrnb2
chrng
clec3a
clps
colec11
cox15
cpa4
cpn1
cpo
crfr
crisp1
crisp3
crp
crsp1
csh2
csn2
cst9
cstl1
ct
ctsv
cxcl11
cxcl17
cytl1
d11lgp1
dct
defb
defb11
defb122
defb122a
dkfzp313g1735
dlk
draxin
dsg3
ebd
edar
ela2
elane
elspbp1
emc1
emc7
emr3
epo
erbb2
f7
fam132b
fam185a
fam19a1
fam5c
fcar
fcgriii
fcn2
fcnb
fgf19
fgf21
fgf23
fgf4
fgf5
fgfbp1
fndc7
fshb
gabra5
gabra6
gabrp
gabrr2
gabrr3
gba3
gdf3
gdf7
gdnf
gh1
ghrh
ghrl
gif
glipr1
glmp
glra1
glra2
glra4
glt6d1
gml
gpc1
gpc2
gpr158
grin3a
gsg1l
guca2b
gusb
hamp
hstn
htr3a
ifnaa
ifnac
ifnb1
ifnb2
ifnt1
ifnw1
igk
iglon5
igsf1
igsf6
il11
il12b
il13
il13ra1
il17a
il2
il20
il21
il22ra2
il24
il3
il9
inhbc
inhbe
iq217
itln1
itln2
kal1
kiaa0319
kir2dl1
kir3dl3
kir3ds1
klk15
kng2
kremen2
krtdap
lamb4
lamp5
lgi3
lgmn
loc100296421
loc100335205
loc100850470
loc505468
loc506364
loc508916
loc509961
loc510860
loc512548
loc515150
loc516378
loc517108
loc518134
loc519952
loc521877
loc525599
loc529593
loc531692
loc536445
loc539818
loc540057
loc618559
loc618664
loc618826
loc777593
loc783399
loc788112
loc790811
lrit1
lrit2
lrit3
lrp1
lrrc3c
lrrc52
lta
ly6d
ly6g6d
ly6g6f
ly96
lypd6
lypd8
lyz
lyzf2
lyzl4
m6pr
md2
mdk
megf8
mepe
mgc139603
mgc148871
mgc151921
mgc157408
mhcla1
mhcla2
mia
mic
milr1
mln
mmp20
mmp8
mptx
mr1
mrc1
muc13
muc5b
mupcdh
napsa
ncr1
nepn
nms
nomo1
nppa
nptx2
npw
npy
ntn3
oc90
odam
otol1
otos
pag10
pag11
pag3
pag6
pag7
pag9
papl
pcsk2
pde7a
pdilt
pdyn
pglyrp3
pip
pkhd1
pla2g12b
pla2g2e
plac1
plbd1
pnliprp3
prlh
prok1
prp
prp7
prp8
prp9
prss16
prss27
prss37
pth
ptp
ptprq
pyy
pyy2
qrfp
rdh12
reg4
rnase7
rs1
scgb1c1
scgb1d
scgb2a2
serpina4
serpina6
sfta2
sftpd
shh
siat8f
siglec5
sirpd
slitrk3
slurp1
spaca4
spadh1
spadh2
spink1
splunc2b
sppl2c
srgn
srn
srpx
stath
sulf1
tac3
tex101
tfpi
tgoln2
tkdp1
tkdp3
tmem234
tmem9
trbv16
treml1
tril
tryp8
tshb
tyr
ucn
ucn2
ugt2b15
upk3a
upk3bl
vgf
vpreb1
wfdc13
wnt16
xcl1
zg16
zp4
zpld1
