# Supplementary material for: Integrated data mining of transcriptomic and proteomic datasets to predict the secretome of adipose tissue and muscle in ruminants
Source: Royal Society of Chemistry journal article supplement (doi:10.1039/c6mb00224b), 2016-06-20
Supplement: c6mb00224b1.zip [file Supplemental_data_SharedGeneName_Bonnet.xlsx]

## Sheet: Shared Gene Name
Gene names corresponding to 1749 proteins found to be putatively secreted both by adipose tissue and muscle
a1bg
a2m
a2ml1
aasdhppt
abca2
abi3bp
abp1
acan
ace
ace2
acp5
acpp
acpt
acr
acrbp
acsm3
acvr1
acvr1b
acvr2a
acvr2b
acvrl1
adam10
adam12
adam15
adam17
adam19
adam2
adam33
adamts10
adamts12
adamts14
adamts15
adamts18
adamts19
adamts2
adamts20
adamts3
adamts6
adamts8
adamts9
adamtsl1
adamtsl2
adck1
adcyap1
adipoq
adm
aebp1
afm
afp
aga
ager
agr2
agrn
agrp
ahsg
alb
alcam
alg1
alg6
alg8
alpl
ambn
ambp
amelx
amh
amhr2
amica1
amigo1
amigo2
amigo3
amy2b
angpt1
angpt2
angpt4
angptl1
angptl2
angptl3
angptl4
angptl5
angptl7
antxr1
antxr2
aoah
apcs
apln
aplp1
apoa1
apoa2
apoa4
apob
apoc2
apoc3
apoc4
apod
apoe
apoh
apom
areg
arsb
arse
arsi
arsk
art3
art5
asah1
asam
asip
aspn
atrnl1
avp
axl
azgp1
b2m
b3galt4
b3gnt3
b3gnt8
b3gnt9
b9d1
bace1
bace2
bai1
bambi
bcam
bcan
bdnf
bglap
bgn
bmp2
bmp3
bmp4
bmp5
bmp6
bmper
bmpr1a
boc
bpi
bpifa1
bpifb1
bpifc
breh1
bri3bp
brinp1
brinp3
brn
bsg
bst1
btc
btd
btn1a1
btn3a2
btn3a3
bola
c10h14orf1
c10h15orf24
c11h2orf7
c11orf24
c12orf73
c13h10orf38
c13h20orf71
c14orf37
c19orf80
c1qa
c1qb
c1ql1
c1ql2
c1ql3
c1qtnf1
c1qtnf2
c1qtnf3
c1qtnf5
c1qtnf6
c1qtnf9
c1r
c1s
c2
c21orf62
c3
c4a
c6
c6orf25
c7
c8a
c8b
c9
c9h6orf186
c9orf59
ca10
ca11
ca14
ca4
ca6
ca9
cacna1a
cadm1
cadm2
cadm3
calcr
calcrl
calr
calu
casr
cathl1
cathl4
cathl5
cathl6
cbln3
cbln4
ccdc107
ccdc134
ccdc3
ccdc47
ccdc80
ccdc88b
ccer2
cck
ccl11
ccl14
ccl16
ccl19
ccl2
ccl21
ccl22
ccl24
ccl25
ccl28
ccl3
ccl4
ccl5
ccl8
ccr7
cd109
cd14
cd164
cd180
cd1a
cd1b3
cd1e
cd2
cd200
cd200r1
cd244
cd248
cd27
cd276
cd28
cd300a
cd300lg
cd302
cd320
cd34
cd3d
cd3e
cd3g
cd4
cd40
cd44
cd47
cd48
cd5
cd55
cd59
cd5l
cd6
cd68
cd7
cd79a
cd83
cd86
cd8a
cd8b
cd97
cd99l2
cdh10
cdh11
cdh13
cdh15
cdh16
cdh17
cdh18
cdh19
cdh22
cdh23
cdh24
cdh5
cdh6
cdh7
cdhr1
cdnf
cdon
ceacam1
ceacam19
cela1
cela3b
celsr2
celsr3
cemip
cercam
ces1
ces2
ces3
ces4a
cfb
cfh
cfi
cfp
cgn1
cgref1
chad
chga
chgb
chia
chid1
chodl
chrdl2
chrna1
chrna10
chrna3
chrna5
chrna7
chrna9
chrnb1
chrnb4
chrnd
chrne
chst1
chst13
cilp2
cl43
cl46
clca1
clca3
clca4
clcc1
clcf1
cldn10
cldn7
clec11a
clec3b
clgn
clk1
clstn3
clu
clul1
cndp1
cnpy2
cnpy3
cnpy4
cntfr
cntn1
cntnap1
cntnap3
coasy
coch
col10a1
col11a2
col15a1
col16a1
col18a1
col1a1
col1a2
col20a1
col21a1
col28a1
col2a1
col5a2
col5a3
col6a1
col6a2
col6a3
col6a6
col7a1
col8a1
col8a2
col9a1
col9a2
col9a3
colgalt1
colq
comp
cp
cpa1
cpa3
cpamd8
cpb1
cpb2
cpd
cpe
cpm
cpn2
cpq
cpvl
cpxm1
cpz
cr2
creg1
creld1
creld2
crh
crhbp
crim1
crisp2
crtac1
crtap
csf1
csf1r
csf2
csf2ra
csf2rb
csf3
csf3r
csn1s1
csn1s2
csn3
cspg4
cst3
cst6
ctgf
cthrc1
ctns
ctrb1
ctrc
ctsa
ctsb
ctsc
ctsf
ctsh
ctsk
ctsl
ctsl1
ctso
ctss
ctsw
ctsz
cubn
cxadr
cxcl10
cxcl12
cxcl13
cxcl14
cxcl16
cxcl6
cxcl8
cxcl9
cyhr1
cym
cyp17a1
cyp2b
cyp2b6
cyp2c18
cyp2c87
cyr61
d2hgdh
dag1
dchs1
dcn
ddost
ddr1
ddr2
defb119
defb4
defb4a
defb5
defb7
dhrs9
dixdc1
dkk2
dkk3
dkkl1
dlk2
dll3
dll4
dmkn
dmp1
dnajb11
dnajb9
dnajc1
dnajc25
dnajc3
dnase1l1
dnase1l2
dnase1l3
dnase2
dnase2b
dpep1
dpep2
dpep3
dpt
dsc1
dsc3
dse
dsel
dsg1
dsg4
duox1
duox2
ebi3
ecm1
ecm2
ecscr
ecsod
edem2
edil3
edn1
edn2
edn3
ednra
ednrb
efemp1
efemp2
efna1
efna2
efna3
efna4
efnb1
efnb3
egfl7
egfl8
egflam
eif2ak3
elfn2
eln
elp5
eltd1
emc10
emcn
emid1
emilin1
emilin2
endod1
endog
endou
eng
enpp4
enpp6
entpd5
eogt
epcam
epha1
epha10
epha2
epha4
epha7
ephb3
ephb4
ephx1
epor
epyc
erap1
erbb3
erlec1
erlin2
ero1l
erp27
erp29
erp44
esam
esm1
evi2a
ephb6
f10
f11
f11r
f12
f13b
f2
f2r
f2rl1
f2rl2
f2rl3
f5
f8
faim3
fam171a2
fam174a
fam174b
fam189a2
fam19a4
fam96a
fat1
fat3
fat4
fbln1
fbln2
fbln5
fbn1
fcer1a
fcgr1a
fcgr3a
fcgrt
fcrlb
fga
fgf10
fgf18
fgf3
fgf7
fgfbp3
fgfr1
fgfr4
fgg
fgl1
fgl2
fibin
figf
fkbp10
fkbp11
fkbp14
fkbp2
fkbp7
fkbp9
flrt3
flt3
flt3lg
fmod
fn1
fndc1
folr1
folr2
fov
foxred2
frem1
frrs1
frzb
fshr
fst
fstl1
fstl3
fuca1
furin
fut11
fxyd5
fzd10
fzd4
fzd5
fzd6
fzd7
fzd8
fzd9
gaa
gabbr1
gabra1
gabra2
gabra3
gabra4
gabrb1
gabrb2
gabrd
gabre
gabrg2
gabrq
gal
galns
galnt15
galnt7
gas1
gas6
gast
gc
gcg
gcgr
gdf10
gdf15
gdf2
gdf5
gdf6
gdf9
gfra1
gfra2
gfra3
ggh
ghdc
ghr
gipr
glb1
glb1l
glg1
glipr1l1
glrb
glt25d2
glycam1
gm2a
gnrh1
gp1ba
gp2
gpa33
gpc3
gpc5
gpc6
gpha2
gpld1
gpnmb
gpr107
gpr113
gpr114
gpr116
gpr124
gpr133
gpr37
gpr37l1
gpr83
gpr97
gpx3
gpx4
gpx5
gpx7
grem1
gria2
grin2b
grin2d
grm2
grm3
grm6
grm7
grn
grp
guca2a
gucy2c
gyltl1b
gzma
gzmb
gzmh
gzmk
habp2
hapln1
hapln2
hapln3
hbegf
heg1
hepacam
hepacam2
heph
hexa
hexb
hfe2
hgf
hhip
hmcn2
hp
hpse
hpx
hrc
hs3st1
hs6st3
hsd11b1l
hsp90b1
hspa13
hspa5
htr3b
htra1
htra4
hyal2
hyou1
ibsp
icam1
icam3
icam4
icam5
icos
icoslg
ids
idua
ier3ip1
ifi30
ifnar1
ifng
ifngr1
ifnlr1
igf1
igf2
igf2r
igfals
igfbp1
igfbp2
igfbp4
igfbp5
igfbp6
igfbp7
igfbpl1
igflr1
igip
igj
igll1
igsf5
igsf8
igsf9
il10
il10ra
il10rb
il11ra
il12a
il12rb1
il12rb2
il13ra2
il17b
il17d
il17f
il17ra
il17rb
il17rc
il17rd
il17re
il18bp
il18rap
il19
il1r1
il1r2
il1rl1
il1rl2
il1rn
il21r
il22ra1
il23a
il25
il27
il27ra
il2ra
il2rb
il2rg
il4
il4r
il5
il5ra
il6
il6r
il6st
il7
il7r
ildr1
ildr2
impg1
impg2
inha
inhba
inhbb
ins
insl3
insl6
insr
islr
islr2
itfg1
itga1
itga10
itga2
itga2b
itga3
itga4
itga6
itga8
itga9
itgad
itgae
itgal
itgam
itgav
itgb1
itgb2
itgb3
itgb4
itgb5
itgb6
itgb7
itgb8
itih1
itih3
itih4
itih5
itprip
izumo1
jag1
jam2
jam3
jtb
kazald1
kcnq5
kdelc1
kdelc2
kdr
kdsr
kera
kiaa1644
kifc2
kirrel2
kirrel3
kit
kitlg
klk1
klk10
klk12
klk13
klk14
klk5
klk7
klk8
kng1
l1cam
lair1
lalba
lama2
lama4
lama5
lamb1
lamb3
lamc1
lamc2
lamp1
lamp2
lat2
layn
lbp
lcn1
lcn12
lcn2
lcnl1
lct
lctl
ldlrad3
leap2
lect2
lefty2
lep
leprel1
lfng
lgals3bp
lgb
lgi1
lgi2
lgi4
lgr4
lgr5
lhb
lhcgr
lif
lingo1
lingo2
lipa
lipc
lipf
lipk
lipm
lman1
lnx1
loc100138951
loc100139881
loc100140261
loc100336868
loc100848815
loc407171
loc504346
loc506828
loc509513
loc510520
loc510798
loc511180
loc512672
loc515676
loc520402
loc521021
loc525415
loc527125
loc528040
loc530553
loc539596
loc539976
loc613433
loc615045
loc616323
loc616942
loc617702
loc781988
loc789799
lox
loxl1
loxl2
loxl3
loxl4
lphn1
lphn3
lpl
lpo
lppr2
lrfn2
lrfn3
lrfn4
lrfn5
lrg1
lrig1
lrig3
lrp10
lrp12
lrp4
lrp8
lrpap1
lrrc17
lrrc24
lrrc25
lrrc3
lrrc32
lrrc38
lrrc3b
lrrc4b
lrrc4c
lrrc66
lrrn1
lrrn3
lrrn4cl
lrrn5
lrrtm1
lrrtm3
lrrtm4
ltbp1
ltbp2
ltbp3
ltbr
ltf
lum
ly6g5b
ly6g6c
ly6g6e
ly6h
ly86
ly9
lynx1
lypd1
lypd3
lypd4
lypd5
lypd6b
lys
lyve1
lyz1
lyz2
lyzl1
lyzl6
madcam1
mag
mamdc4
manba
manf
mansc1
masp1
masp2
matn1
matn2
matn3
matn4
mbl
mbtps1
mcam
mcfd2
mdga1
megf10
mep1b
mesdc2
met
metrn
mfap2
mfap3l
mfap4
mfap5
mfge8
mfi2
mgc126945
mgc127538
mgc133692
mgc139448
mgc142695
mgc142894
mgc152010
mgc152360
mgp
mgst2
mia3
mic1
minpp1
mlec
mmp1
mmp13
mmp14
mmp15
mmp17
mmp2
mmp27
mmp28
mmp7
mmp9
mmrn1
mmrn2
mog
moxd1
mpeg1
mpl
mpo
mpz
mpzl2
msi2
msln
msrb3
mst1
mst1r
mstn
muc1
muc15
musk
mxra5
mxra8
mydgf
myoc
naglu
nagpa
nbl1
ncam1
ncam2
ncan
ncr3
ncstn
ndp
nell2
nenf
neto2
ngf
ngfr
nid1
nid2
nlgn3
nmb
nme3
nodal
nog
notch1
notch2
notch3
notch4
nov
npb
npc1
npc2
npdc1
npff
nphs1
npnt
nppb
nppc
npr2
npr3
nptn
nptx1
npvf
nrcam
nrn1
nrp1
nrp2
nrros
nrxn1
nrxn2
nt5e
ntf3
ntm
ntn1
ntn4
ntn5
ntng2
ntrk1
ntrk2
nts
nucb1
nucb2
nudt9
numa1
nxph1
nxph2
nxph4
oaf
ogn
oit3
olfm1
olfm4
olfml2a
olfml2b
olfml3
omd
omg
oosp1
opcml
optc
orm1
os9
osm
osmr
ostn
otog
otogl
otor
ovgp1
oxt
p4ha1
p4ha2
p4ha3
p4hb
pag4
pag5
pag8
pam
pamr1
pappa2
pcdh10
pcdh12
pcdh17
pcdh19
pcdh7
pcdh8
pcdh9
pcdha13
pcdhb12
pcdhb14
pcdhb16
pcdhga2
pcdhga3
pcdhga5
pcdhga8
pcdhgb1
pcdhgb4
pcolce
pcolce2
pcsk1
pcsk1n
pcyox1
pcyox1l
pdcd1
pdgfa
pdgfb
pdgfrb
pdgfrl
pdia2
pdia3
pdia4
pdia5
pear1
pebp4
pecam1
penk
pgap3
pgf
pglyrp1
pglyrp2
phf8
pi15
pi16
pigk
pigr
pigt
pigu
pik3ip1
pilra
pkd1
pkdcc
pkhd1l1
pla1a
pla2g10
pla2g12a
pla2g15
pla2g1b
pla2g2a
pla2g2d1
pla2g2d4
pla2g5
pla2g7
pla2r1
plac9
plagl2
plat
plau
plaur
plekhh3
plg
plod1
plod2
plod3
pltp
plxdc1
plxdc2
plxna4
plxnb1
plxnb2
plxnc1
pm20d1
pmch
pmel
pnlip
pnliprp2
pnoc
podxl2
poglut1
pomc
pomgnt2
pon1
pon2
pon3
postn
ppic
ppp1r15a
ppt1
ppt2
ppy
prap1
prcp
prdx4
prelp
prf1
prg4
prima1
prkcsh
prl
prlr
prnd
prnp
proc
procr
prok2
prom1
prom2
pros1
prp1
prp5
prrg2
prrg4
prrt4
prss12
prss2
prss23
prss35
prss57
psap
psapl1
ptgds
ptgis
ptgs1
ptgs2
pth1r
pth2r
pthlh
pti
ptk7
ptn
ptpn11
ptpra
ptpre
ptprf
ptprk
ptprm
ptprn
ptprr
ptprs
ptpru
ptprz1
pttg1ip
ptx3
pvrl3
pvrl4
qpct
qsox1
r3hdml
raet1g
ramp1
ramp3
ranbp17
rarres1
rarres2
rbm26
rbp3
rcn2
rcn3
rdh11
rdh13
rdh5
reck
reg3a
reg3g
rell1
relt
ren
resp18
ret
retn
retsat
rgmb
rhbdl3
rnase1
rnase13
rnase6
rnf128
rnf130
rnf215
robo4
ror2
rpn1
rpn2
rsad2
rspo1
rspo3
rspry1
rtf1
rtn4r
rtn4rl1
rtn4rl2
rxfp1
saa1
saa4
saraf
sbsn
sbspon
scarb2
scarf1
scarf2
scg2
scg3
scg5
scgb1a1
scn1b
scn2b
scn3b
scn4b
scpep1
scrg1
sctr
scube2
scube3
sdc1
sdc2
sdc4
sdf2
sdf2l1
sdf4
sec22b
sectm1
sele
sell
selplg
selt
sema3b
sema3c
sema3f
sema3g
sema4a
sema4b
sema4c
sema4d
sema4f
sema4g
sema5b
sema6a
sema6b
sema6d
42248
serpina1
serpina10
serpina11
serpina12
serpina3
serpina5
serpina7
serpinc1
serpind1
serpine1
serpine2
serpine3
serpinf1
serpinf2
serping1
serpinh1
serpini1
sez6
sez6l2
sfrp1
sfrp2
sfrp4
sfrp5
sftpa1
sftpb
sgca
sh3gl3
shbg
shisa2
shisa5
siae
sidt2
siglec1
siglec10
sil1
sirpa
slamf1
slamf6
slamf7
slamf8
slc10a5
slc24a5
slc39a10
slc39a12
slc39a13
slc39a14
slc39a4
slc39a5
slc39a7
slc39a8
slc44a5
slc46a3
slc8a1
slc8a2
slc8a3
slc9a2
slit2
slitrk2
slitrk4
slitrk6
smo
smoc1
smpdl3a
smpdl3b
sorcs1
sort1
sost
sostdc1
spaca1
spaca3
spag11
spam1
sparc
sparcl1
spesp1
spink2
spink4
spink5
spinlw1
spint1
spint2
splunc2a
spock2
spon1
spon2
spp1
spp2
sppl2b
sprn
spx
srbd1
srl
srpx2
ssc5d
sslp1
sspo
ssr1
ssr4
sst
st8sia4
stab1
stab2
stc1
stc2
stim1
stradb
strc
sts
sulf2
sumf1
sumf2
susd2
susd5
svep1
saa3
tac1
tacstd2
tapbp
tapbpl
tas1r1
tas1r2
tbl2
tcn1
tcn2
tctn1
tctn2
tctn3
tdgf1
tectb
tek
tff2
tff3
tfpi2
tg
tgfb1
tgfb2
tgfbr1
thbs1
thbs2
thbs3
thbs4
thsd1
thsd4
ticrr
timd4
timp1
timp2
timp3
timp4
tinagl1
tkdp4
tlr2
tlr3
tlr4
tlr5
tlr9
tm2d1
tm2d3
tm7sf3
tm9sf1
tm9sf3
tm9sf4
tmco3
tmed1
tmed10
tmed2
tmed3
tmed5
tmed6
tmed7
tmeff1
tmem108
tmem109
tmem119
tmem130
tmem132a
tmem140
tmem150a
tmem158
tmem161a
tmem165
tmem194b
tmem204
tmem213
tmem25
tmem27
tmem59
tmem59l
tmem8
tmem81
tmem87a
tmem87b
tmem9b
tmigd1
tmx1
tmx3
tmx4
tnfrsf10a
tnfrsf11a
tnfrsf11b
tnfrsf12a
tnfrsf18
tnfrsf19
tnfrsf1a
tnfrsf1b
tnfrsf25
tnfrsf4
tnfrsf6b
tnn
tnr
tor2a
tor3a
tp53i13
tpp1
tpsb1
tpst2
treh
trem1
trem2
treml2
trh
trpc2
tshr
tsku
ttc13
ttr
tusc3
twsg1
txndc12
txndc15
tyro3
tyrp1
ucn3
uggt2
ugt1a1
ugt2a3
ugt2b10
ugt2b4
ulbp11
ulbp21
ulbp3
umod
unc5b
upk2
upk3b
vasn
vcam1
vcan
vegfa
vegfb
vegfc
vip
vipr1
vipr2
vit
vnn1
vsig1
vsig2
vsig4
vsig8
vstm2l
vstm4
vtn
vwa2
vwa7
vwce
vwf
wfdc18
wfdc2
wfikkn1
wif1
wisp2
wnt1
wnt10a
wnt10b
wnt2
wnt5b
wnt6
xcl2
xg
xpnpep2
xrcc5
zfp37
zmym6nb
zp3
zpbp2
agp
bmk
bovaggrus
canx
casq1
fgfr3
fut13
ob
pofut1
pofut2
